# Supplementary material
Source: PubMed Central journal article supplement (PMC2276841)

## Supplementary Figure 1

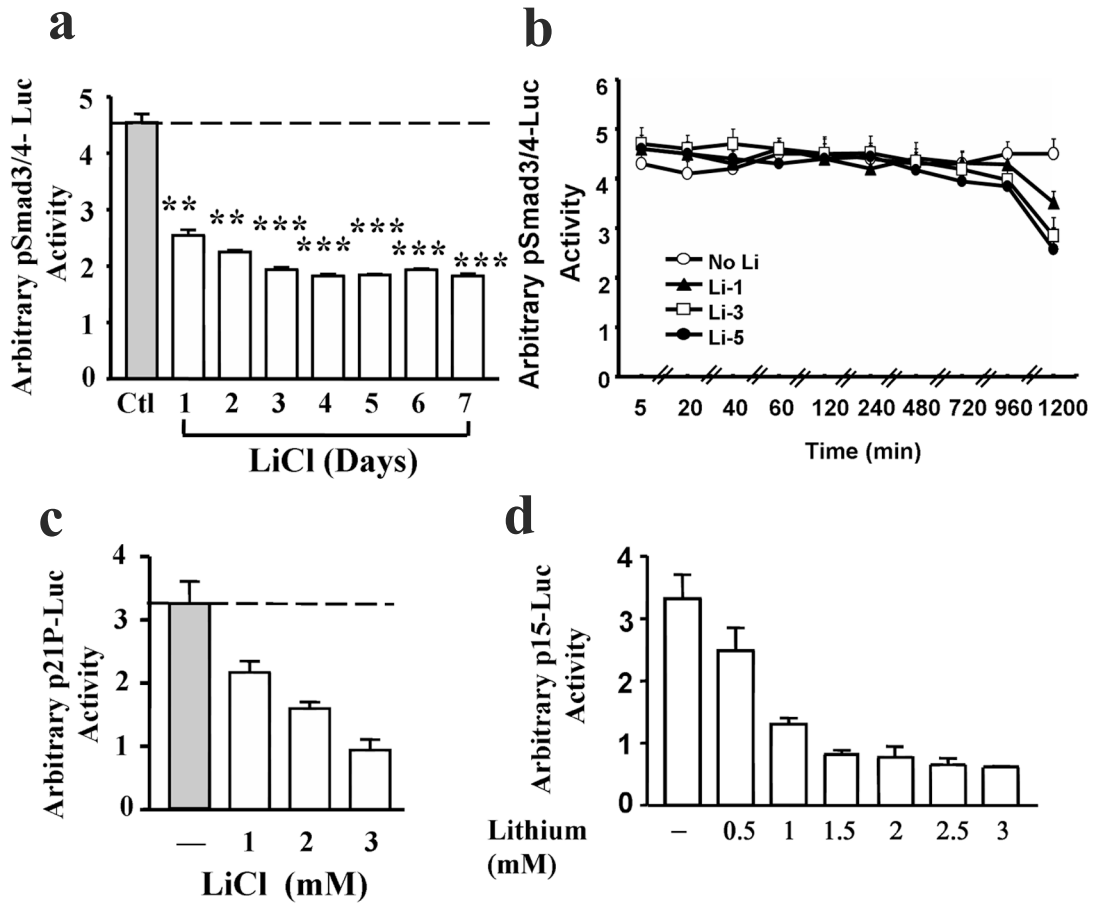

Supplement: NIHMS42945-supplement-01.pdf [file NIHMS42945-supplement-01.pdf]

## Supplementary Figure 2

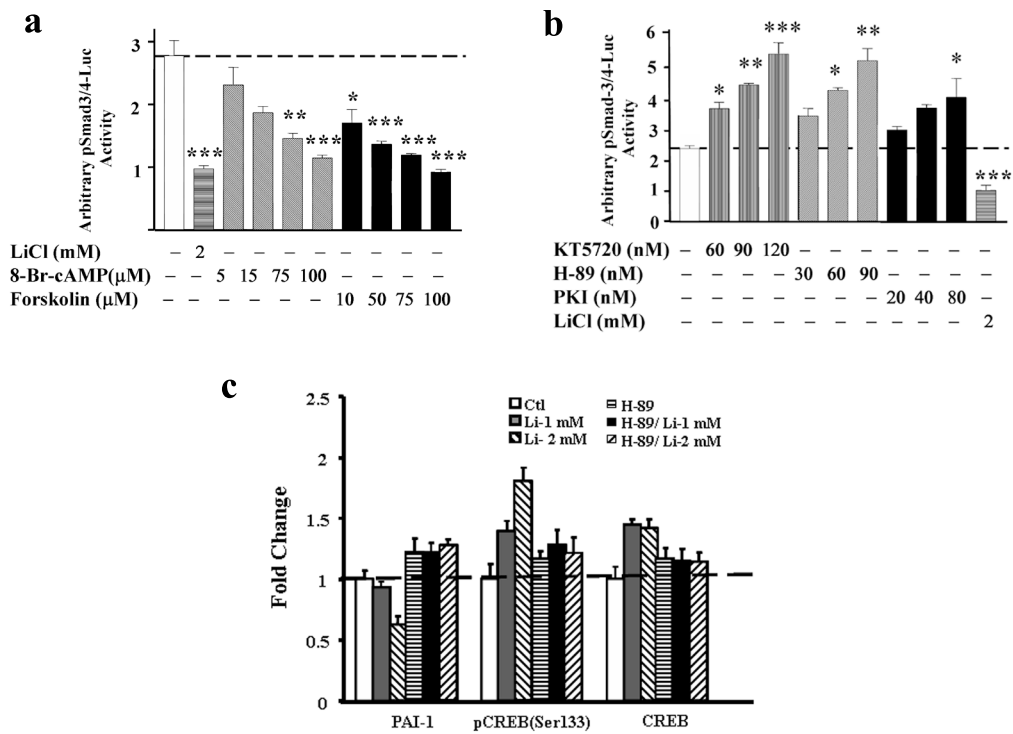

Supplement: NIHMS42945-supplement-02.pdf [file NIHMS42945-supplement-02.pdf]

### Supplementary Figure 4

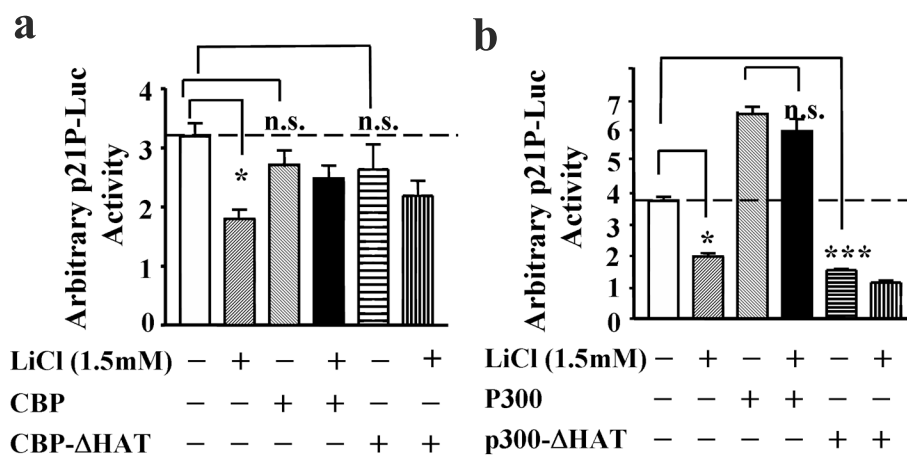

Supplement: NIHMS42945-supplement-04.pdf [file NIHMS42945-supplement-04.pdf]

# Supplementary Figure 5

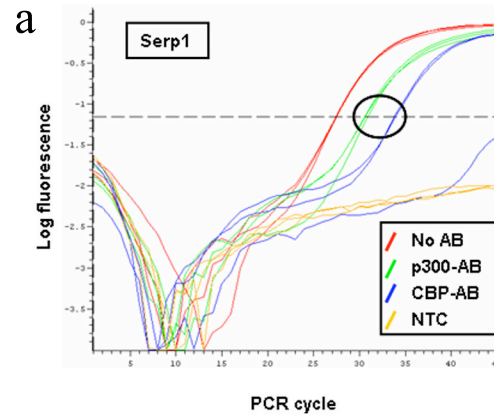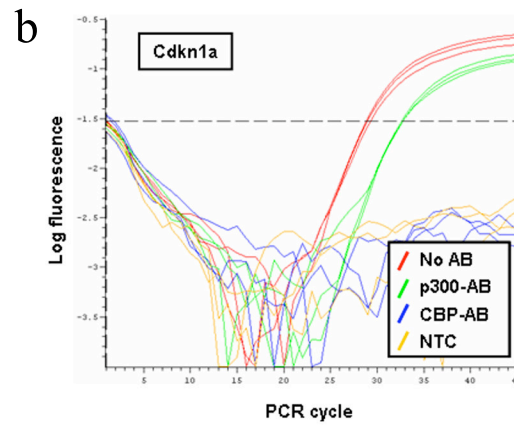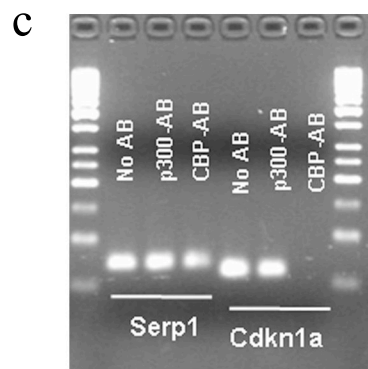

Supplement: NIHMS42945-supplement-05.pdf [file NIHMS42945-supplement-05.pdf]
